# Supplementary material for: Combination of AIBP, apoA-I, and Aflibercept Overcomes Anti-VEGF Resistance in Neovascular AMD by Inhibiting Arteriolar Choroidal Neovascularization
Source: PubMed Central journal article supplement — Invest Ophthalmol Vis Sci. 2022 Nov 1;63(12):2. doi: 10.1167/iovs.63.12.2 (PMC9639697; doi:10.1167/iovs.63.12.2), 2022-11-01
Supplement: iovs-63-12-2_s001.pdf [file iovs-63-12-2_s001.pdf]

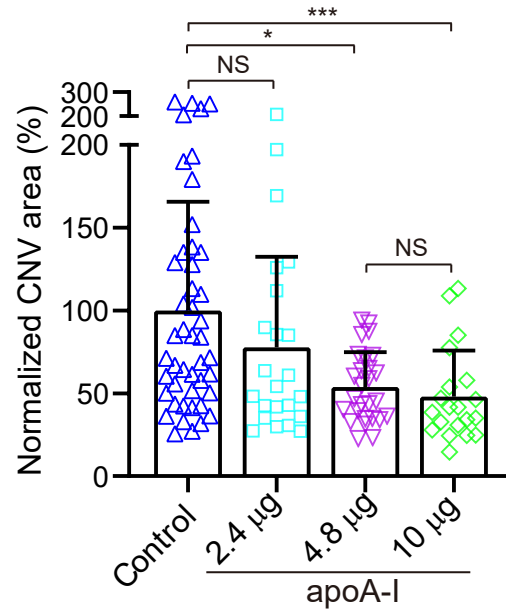

**Fig. S1. Dose-ranging study for apoA-I on laser-induced CNV in 8-10 week-old mice.** AIBP was kept at 2.4 µg. N=46, 23, 27, and 20 laser spots for control, 2.4 µg, 4.8 µg, and 10 µg, respectively. Bars represent mean ± SD. Statistical analysis was performed by Kruskal-Wallis test with Dunn's post hoc analysis. NS, not significant; \*,  $P < 0.05$ ; \*\*\*,  $P < 0.0001$ .

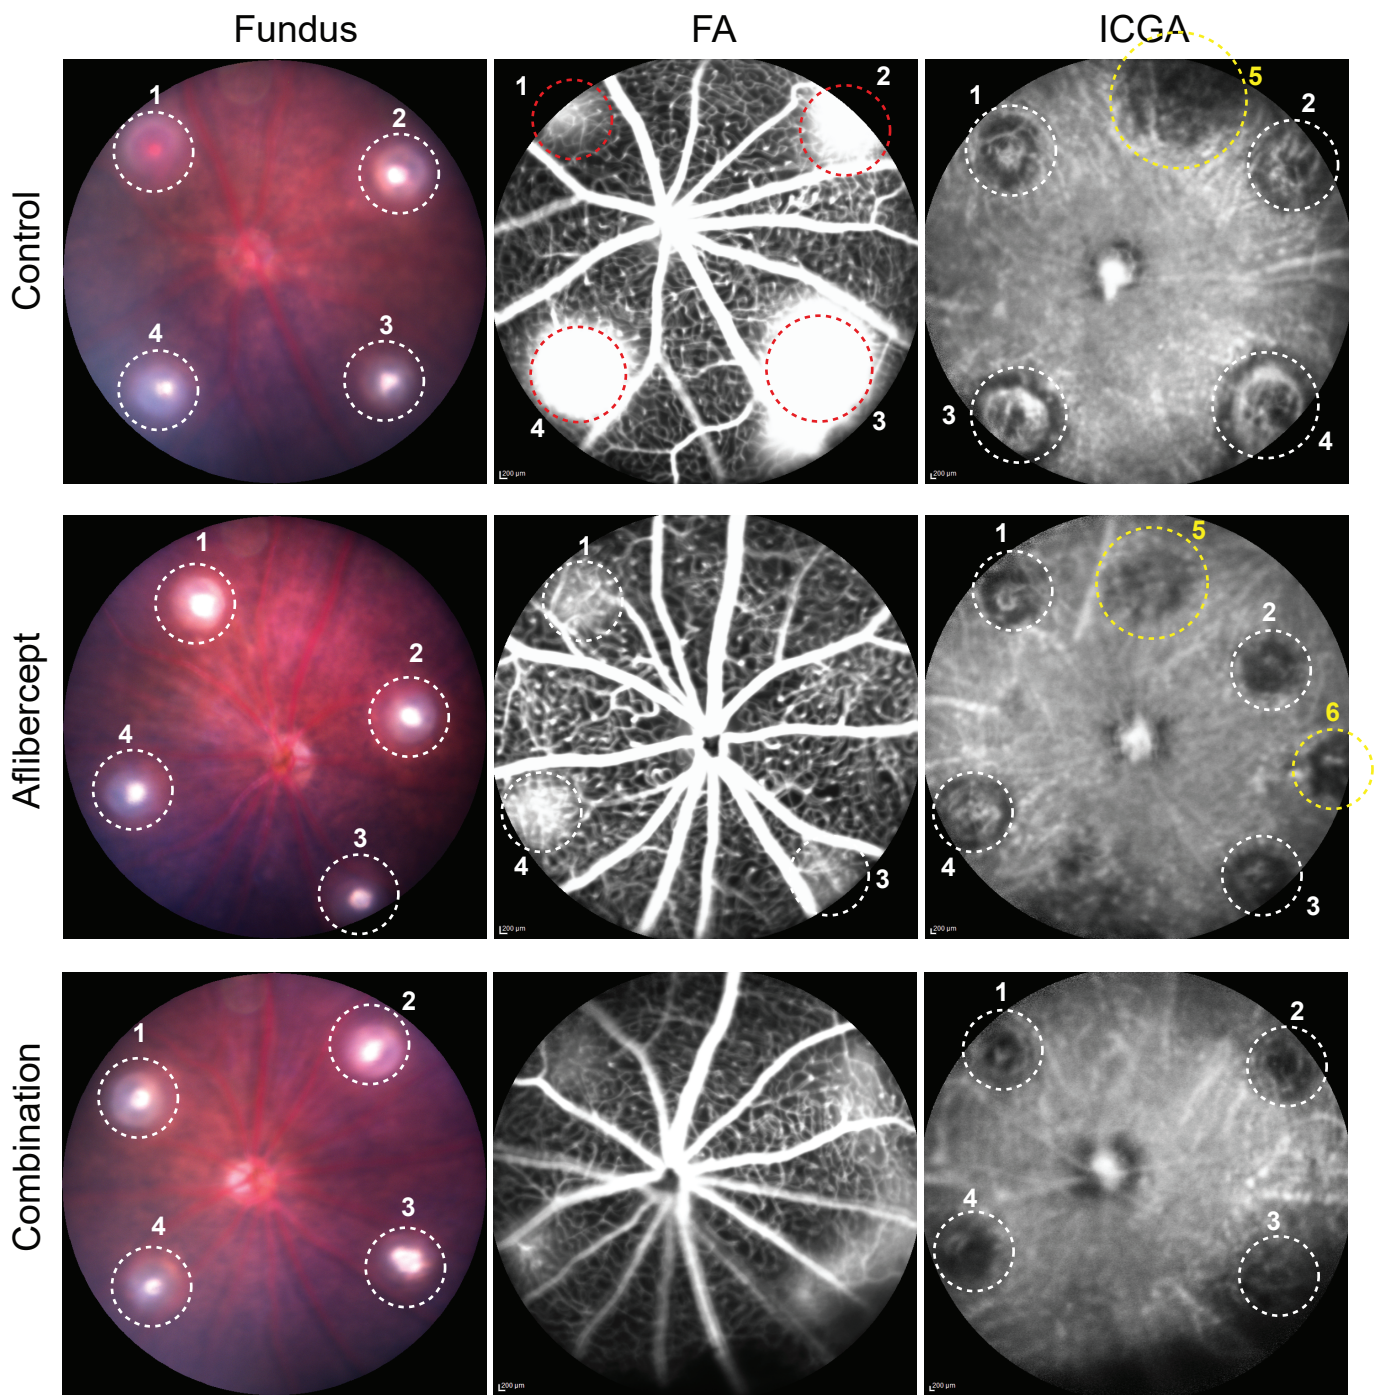

**Fig. S2. Fundus photography, FA, and ICGA of laser induced CNV after different treatment in young mice.** Fundus images were taken immediately after laser photocoagulation to show the laser spots with bubble formation. FA (late phase) and ICGA images were from Fig. 6. For the aflibercept treated eye, spots # 5 and 6 were not laser spots, but may reflect some issues of the choroidal vasculature of that particular eye. Note, aflibercept treatment stopped the leakage from spot #2. For the control eye, spot #5 was caused by injection injury. For the combination treated eye, leakage was largely eliminated for all 4 laser spots on FA and minimal CNV structure was formed on ICGA.
